# Supplementary material
Source: publisher figshare collection journal article supplement (https://plos.figshare.com/articles/dataset/_/7708850)
Supplement: Supplementary file 1 [file 1]

Archive with 8 entries (8 files):
- pone.0210123.s001.pdf
- pone.0210123.s002.tif
- pone.0210123.s003.tif
- pone.0210123.s004.tif
- pone.0210123.s005.tif
- pone.0210123.s006.tif
- pone.0210123.s007.tif
- pone.0210123.s008.tif
