# Supplementary material
Source: publisher figshare collection journal article supplement (https://plos.figshare.com/articles/dataset/_/7708850)
Supplement: Supplementary file 1 [file 1 › pone.0210123.s001.pdf]

| dsDNA fragment                                                                                          | ZitR <sub>MG</sub> dimer:<br>DNA stoichiometry<br>(n) | Binding<br>affinity<br>K <sub>d</sub> (M.L <sup>1</sup> ) | Enthalpy changes<br>ΔH (kcal.mol <sup>-1</sup> ) |
|---------------------------------------------------------------------------------------------------------|-------------------------------------------------------|-----------------------------------------------------------|--------------------------------------------------|
| <b>Palindrome 1 of Pzit promoter -35 box</b><br><i>AATGT</i> <b>TAACTGG</b> <i>TTGACAT</i> <sup>a</sup> | 1.2 <sup>b</sup>                                      | 0.2.10 <sup>-6<sup>b</sup></sup>                          | 11.3 <sup>b</sup>                                |
| <b>Palindrome 2 of Pzit promoter -10 box</b><br><i>ATAATTA</i> <b>ACCAGTAA</b> <i>CTAA</i> <sup>a</sup> | 1.5 <sup>b</sup>                                      | 0.6.10 <sup>-6<sup>b</sup></sup>                          | 10.6 <sup>b</sup>                                |

<sup>a</sup>Each oligonucleotide is an imperfect palindrome: complementary bases of the inverted repeat are in bold [15, 18]. The -35 and -10 boxes of Pzit promoter, which partially overlap each palindromic sequence, are in italics (the 5' 'T' base of the -10 box is missing in Palindrome 2) [15].

<sup>b</sup>The average values between two independent measurements are shown.
