# Supplementary material
Source: publisher figshare collection journal article supplement (https://plos.figshare.com/articles/dataset/_/7708850)

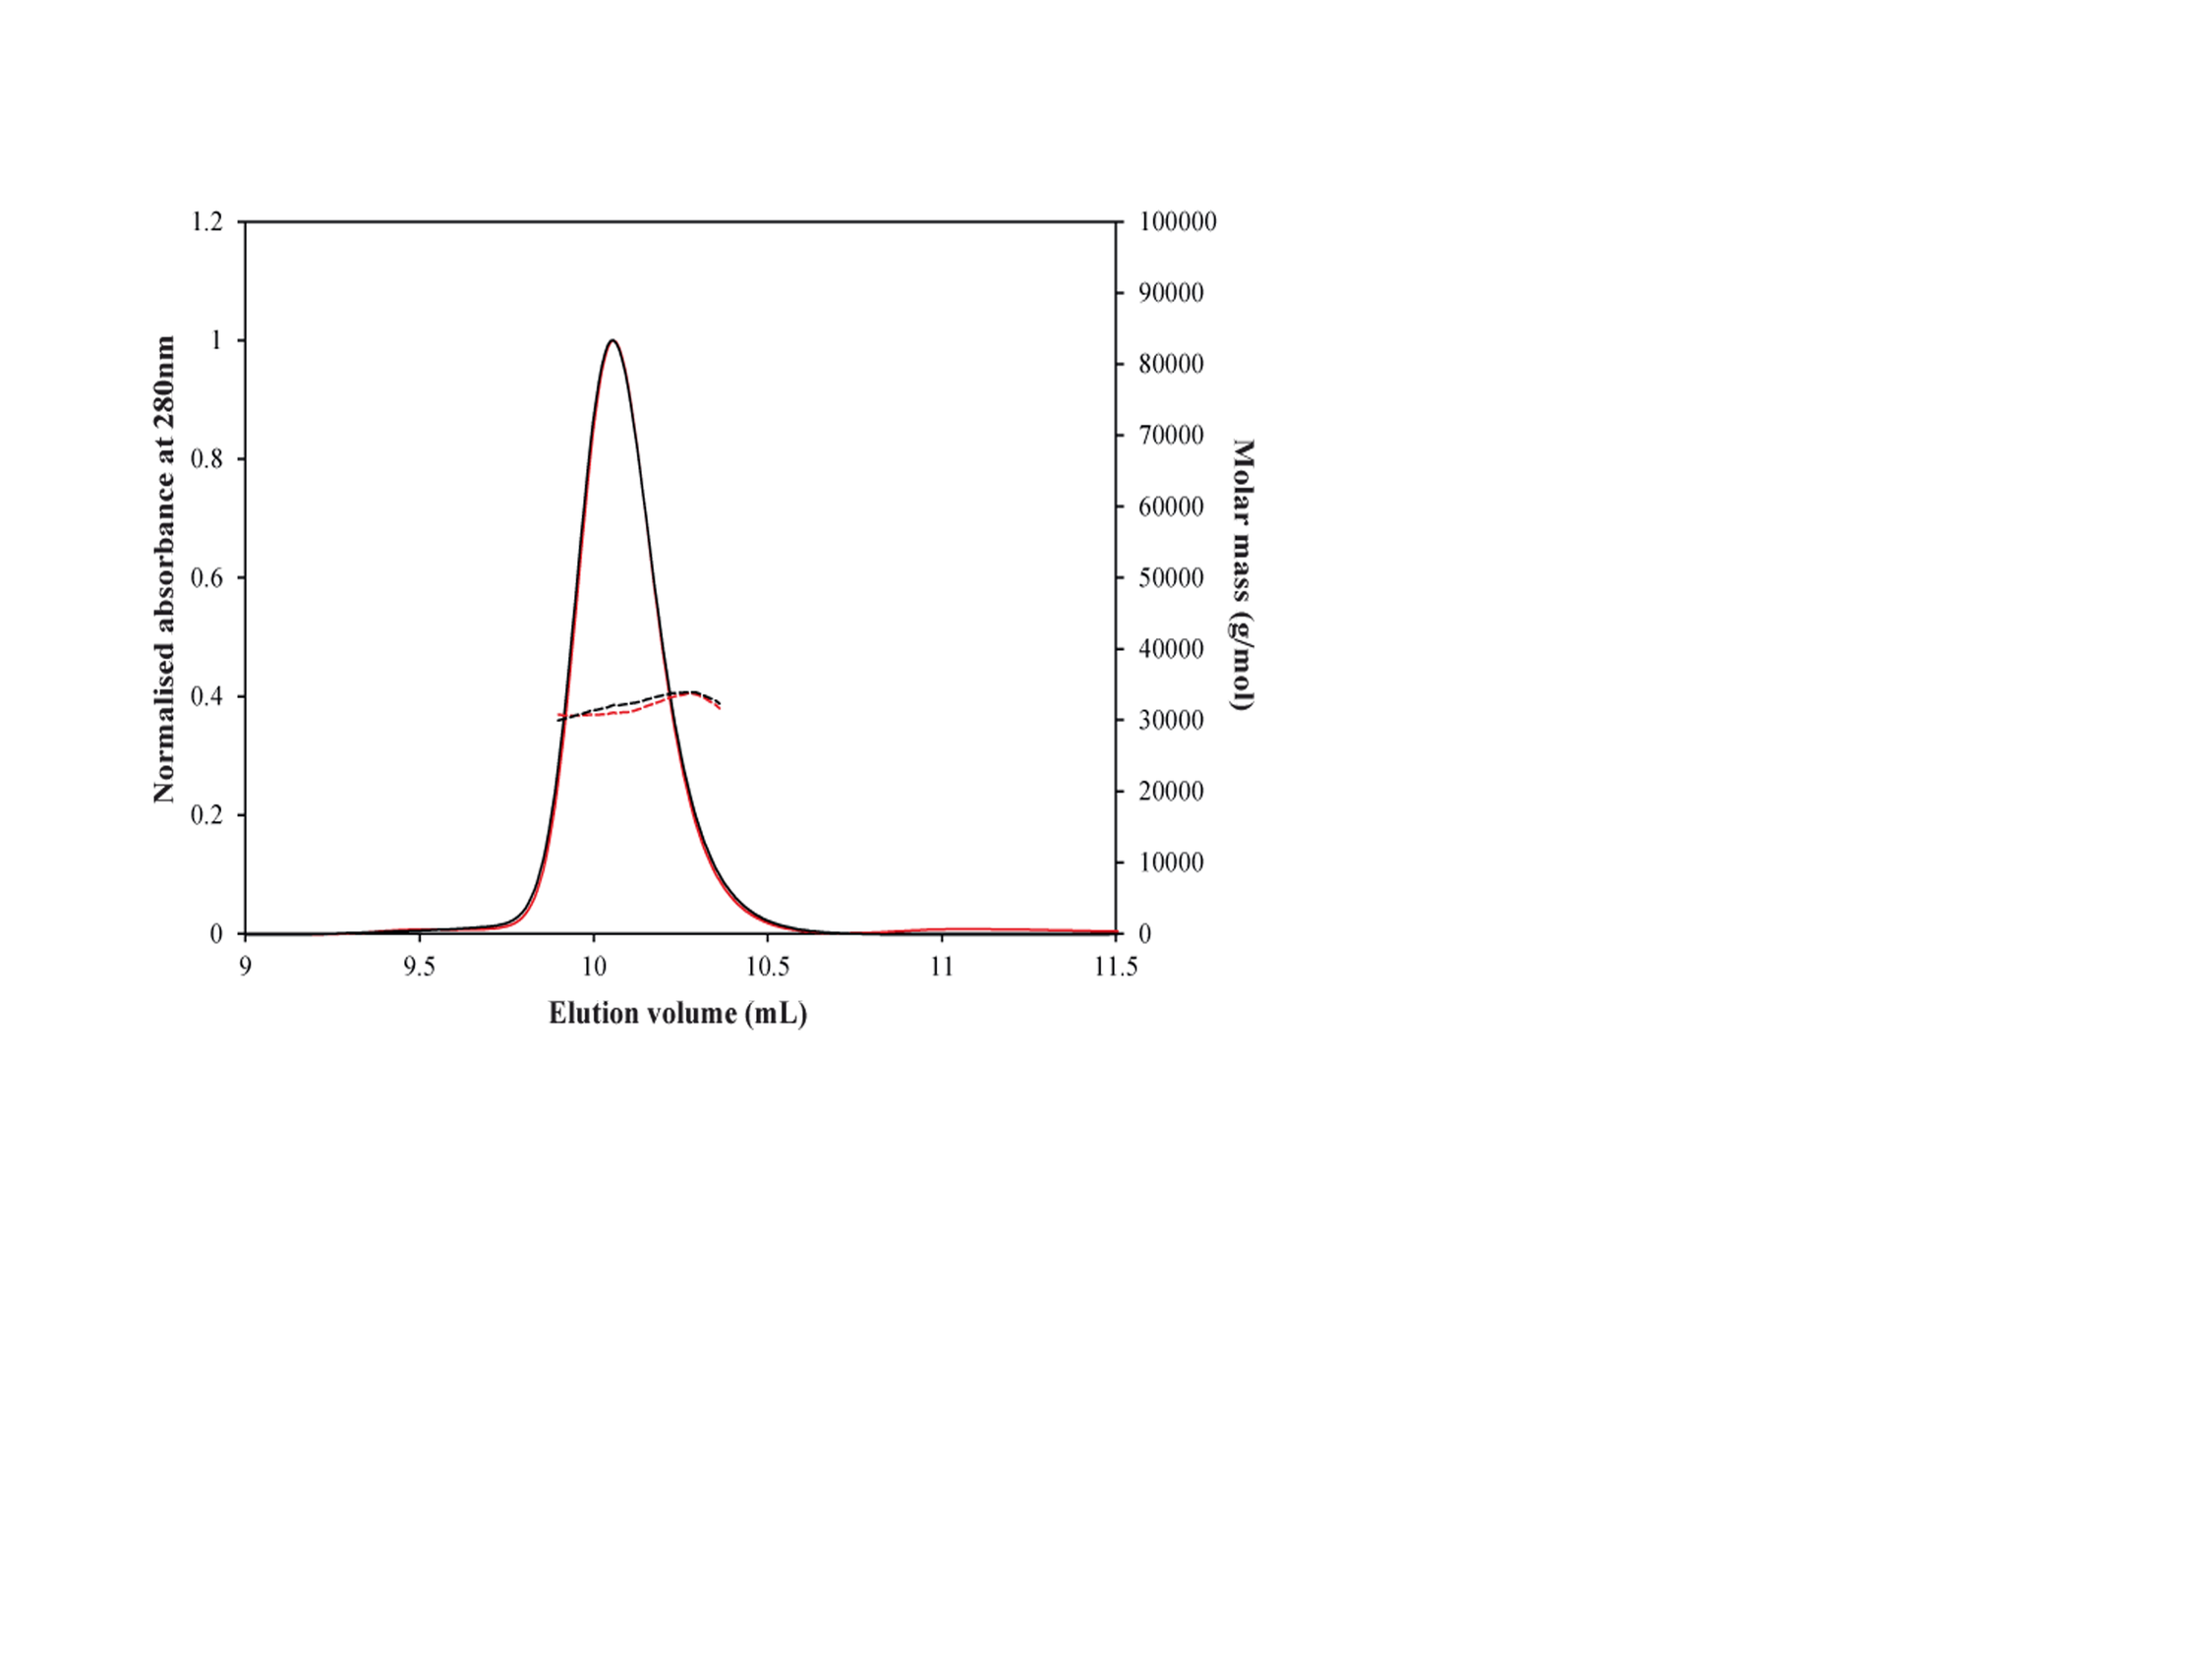

Supplement: Supplementary file 1 [file 1 › pone.0210123.s002.tif]

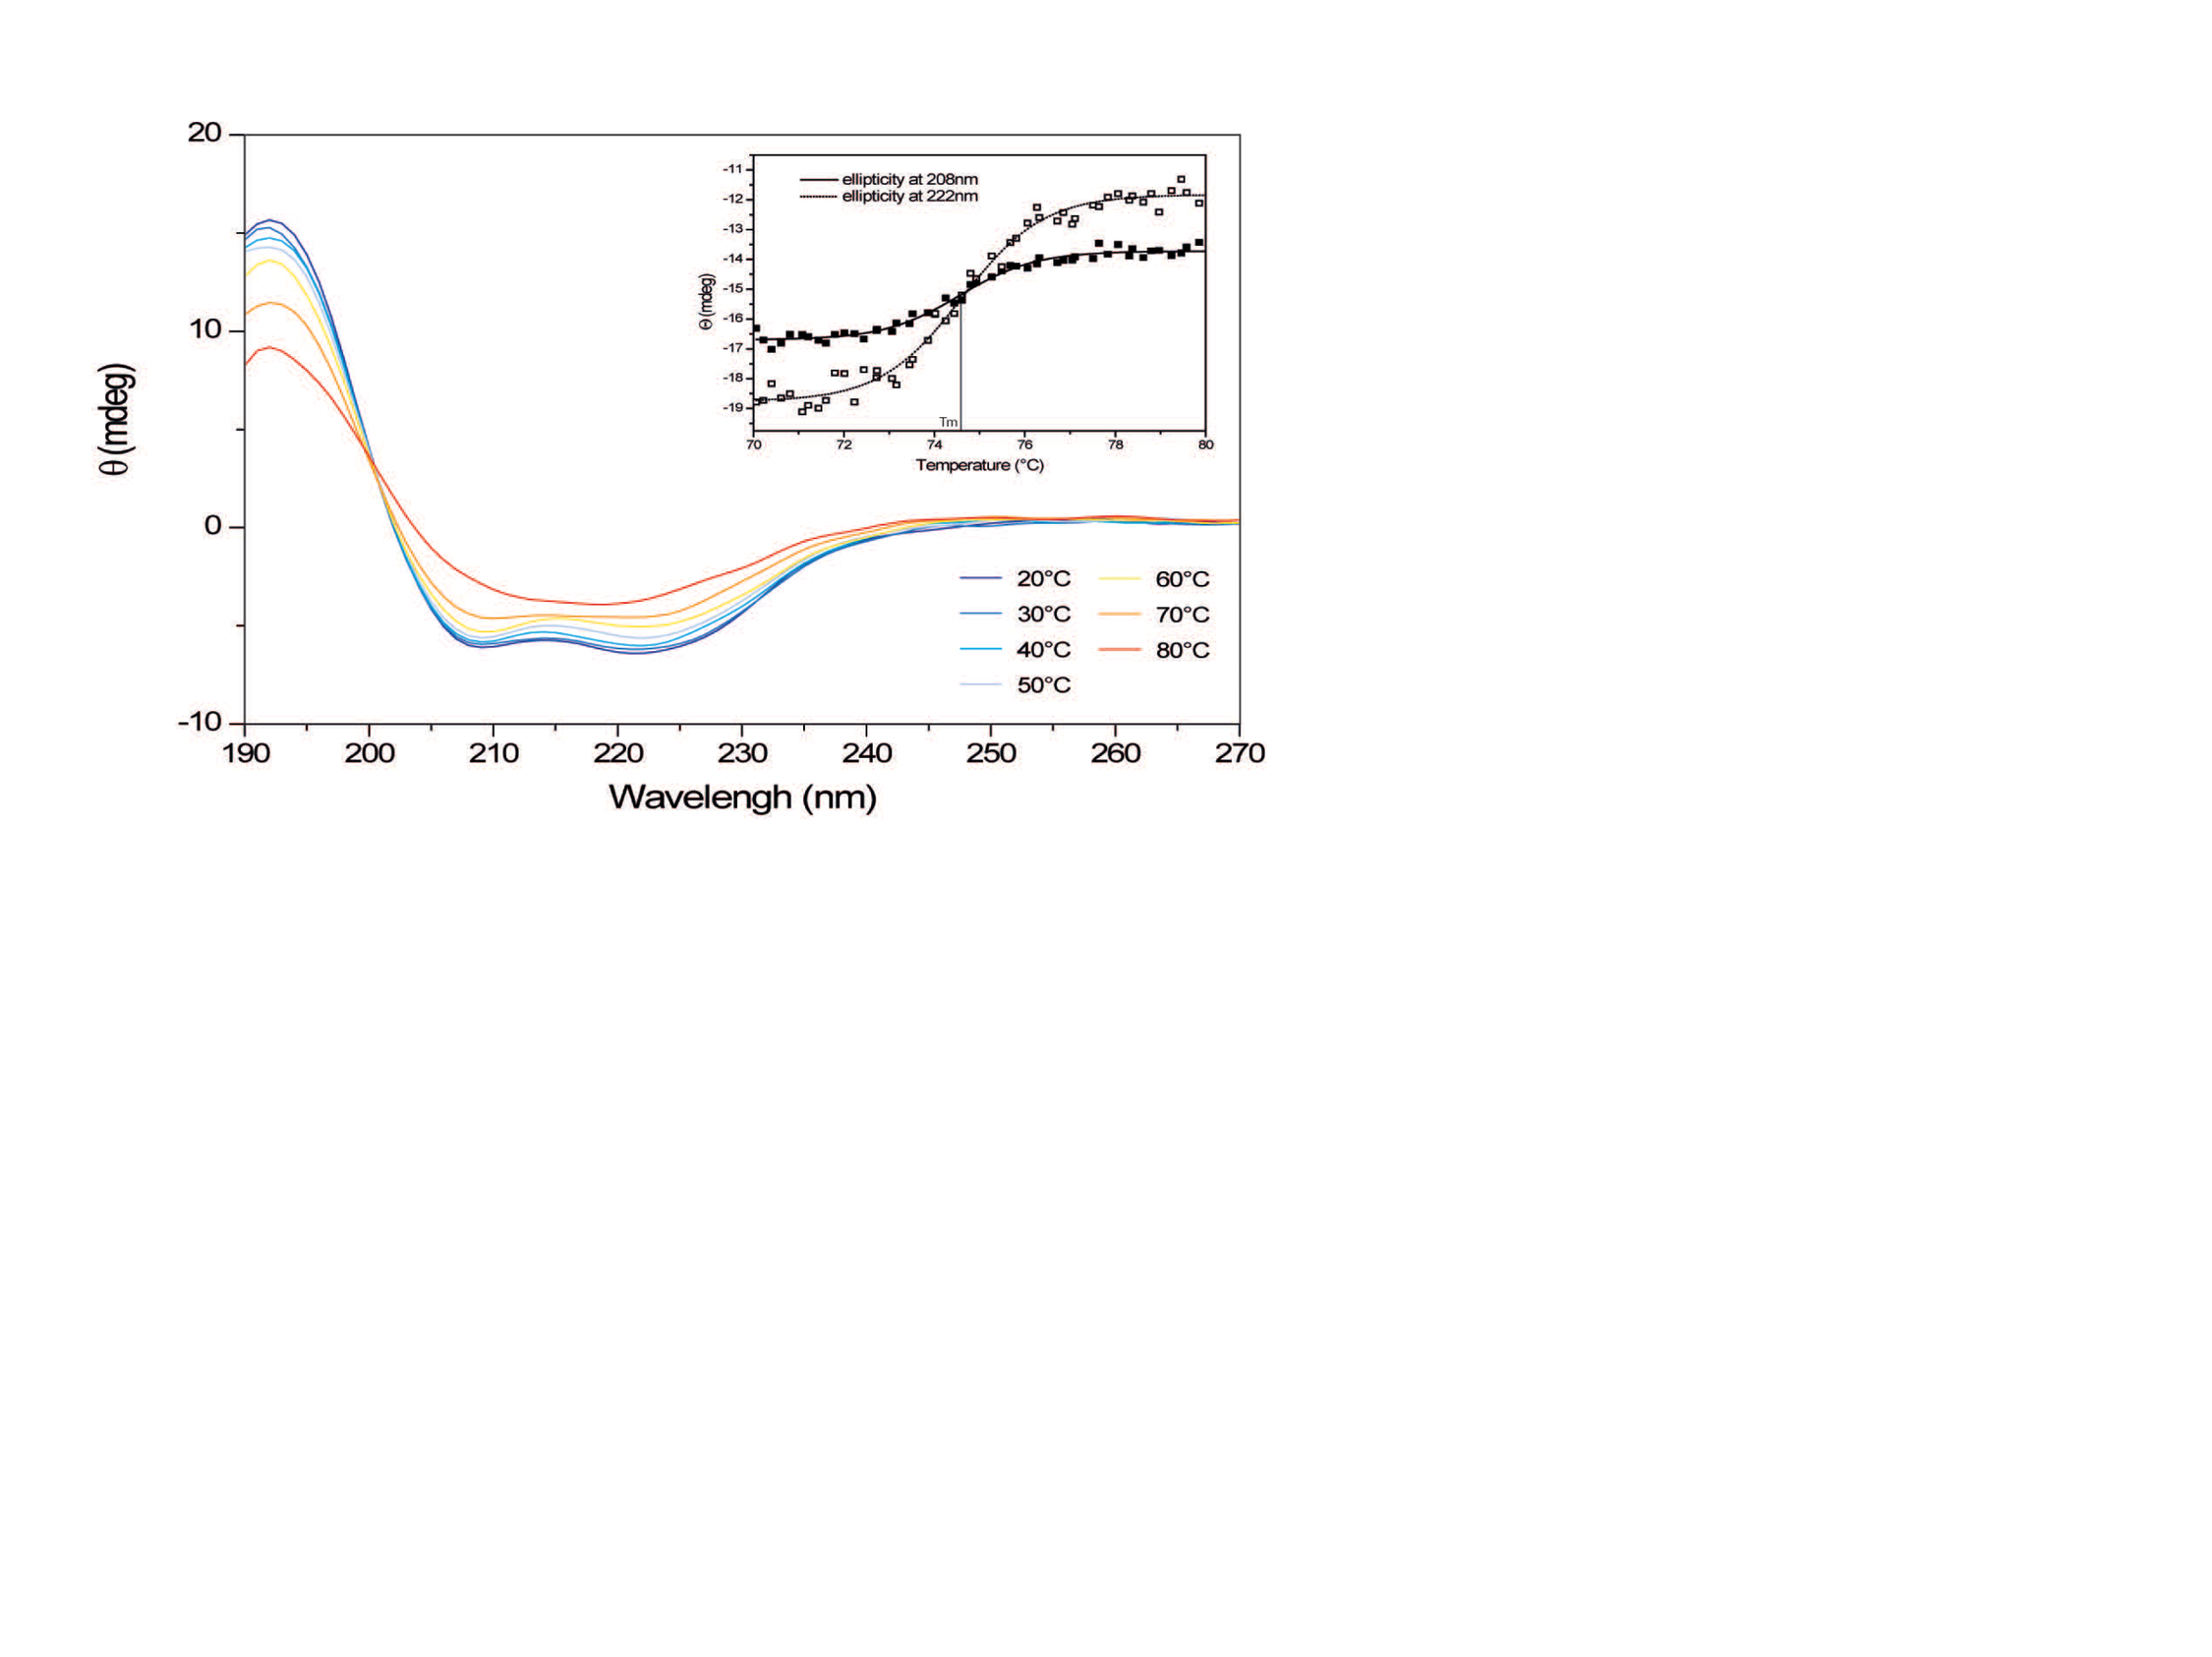

Supplement: Supplementary file 1 [file 1 › pone.0210123.s003.tif]

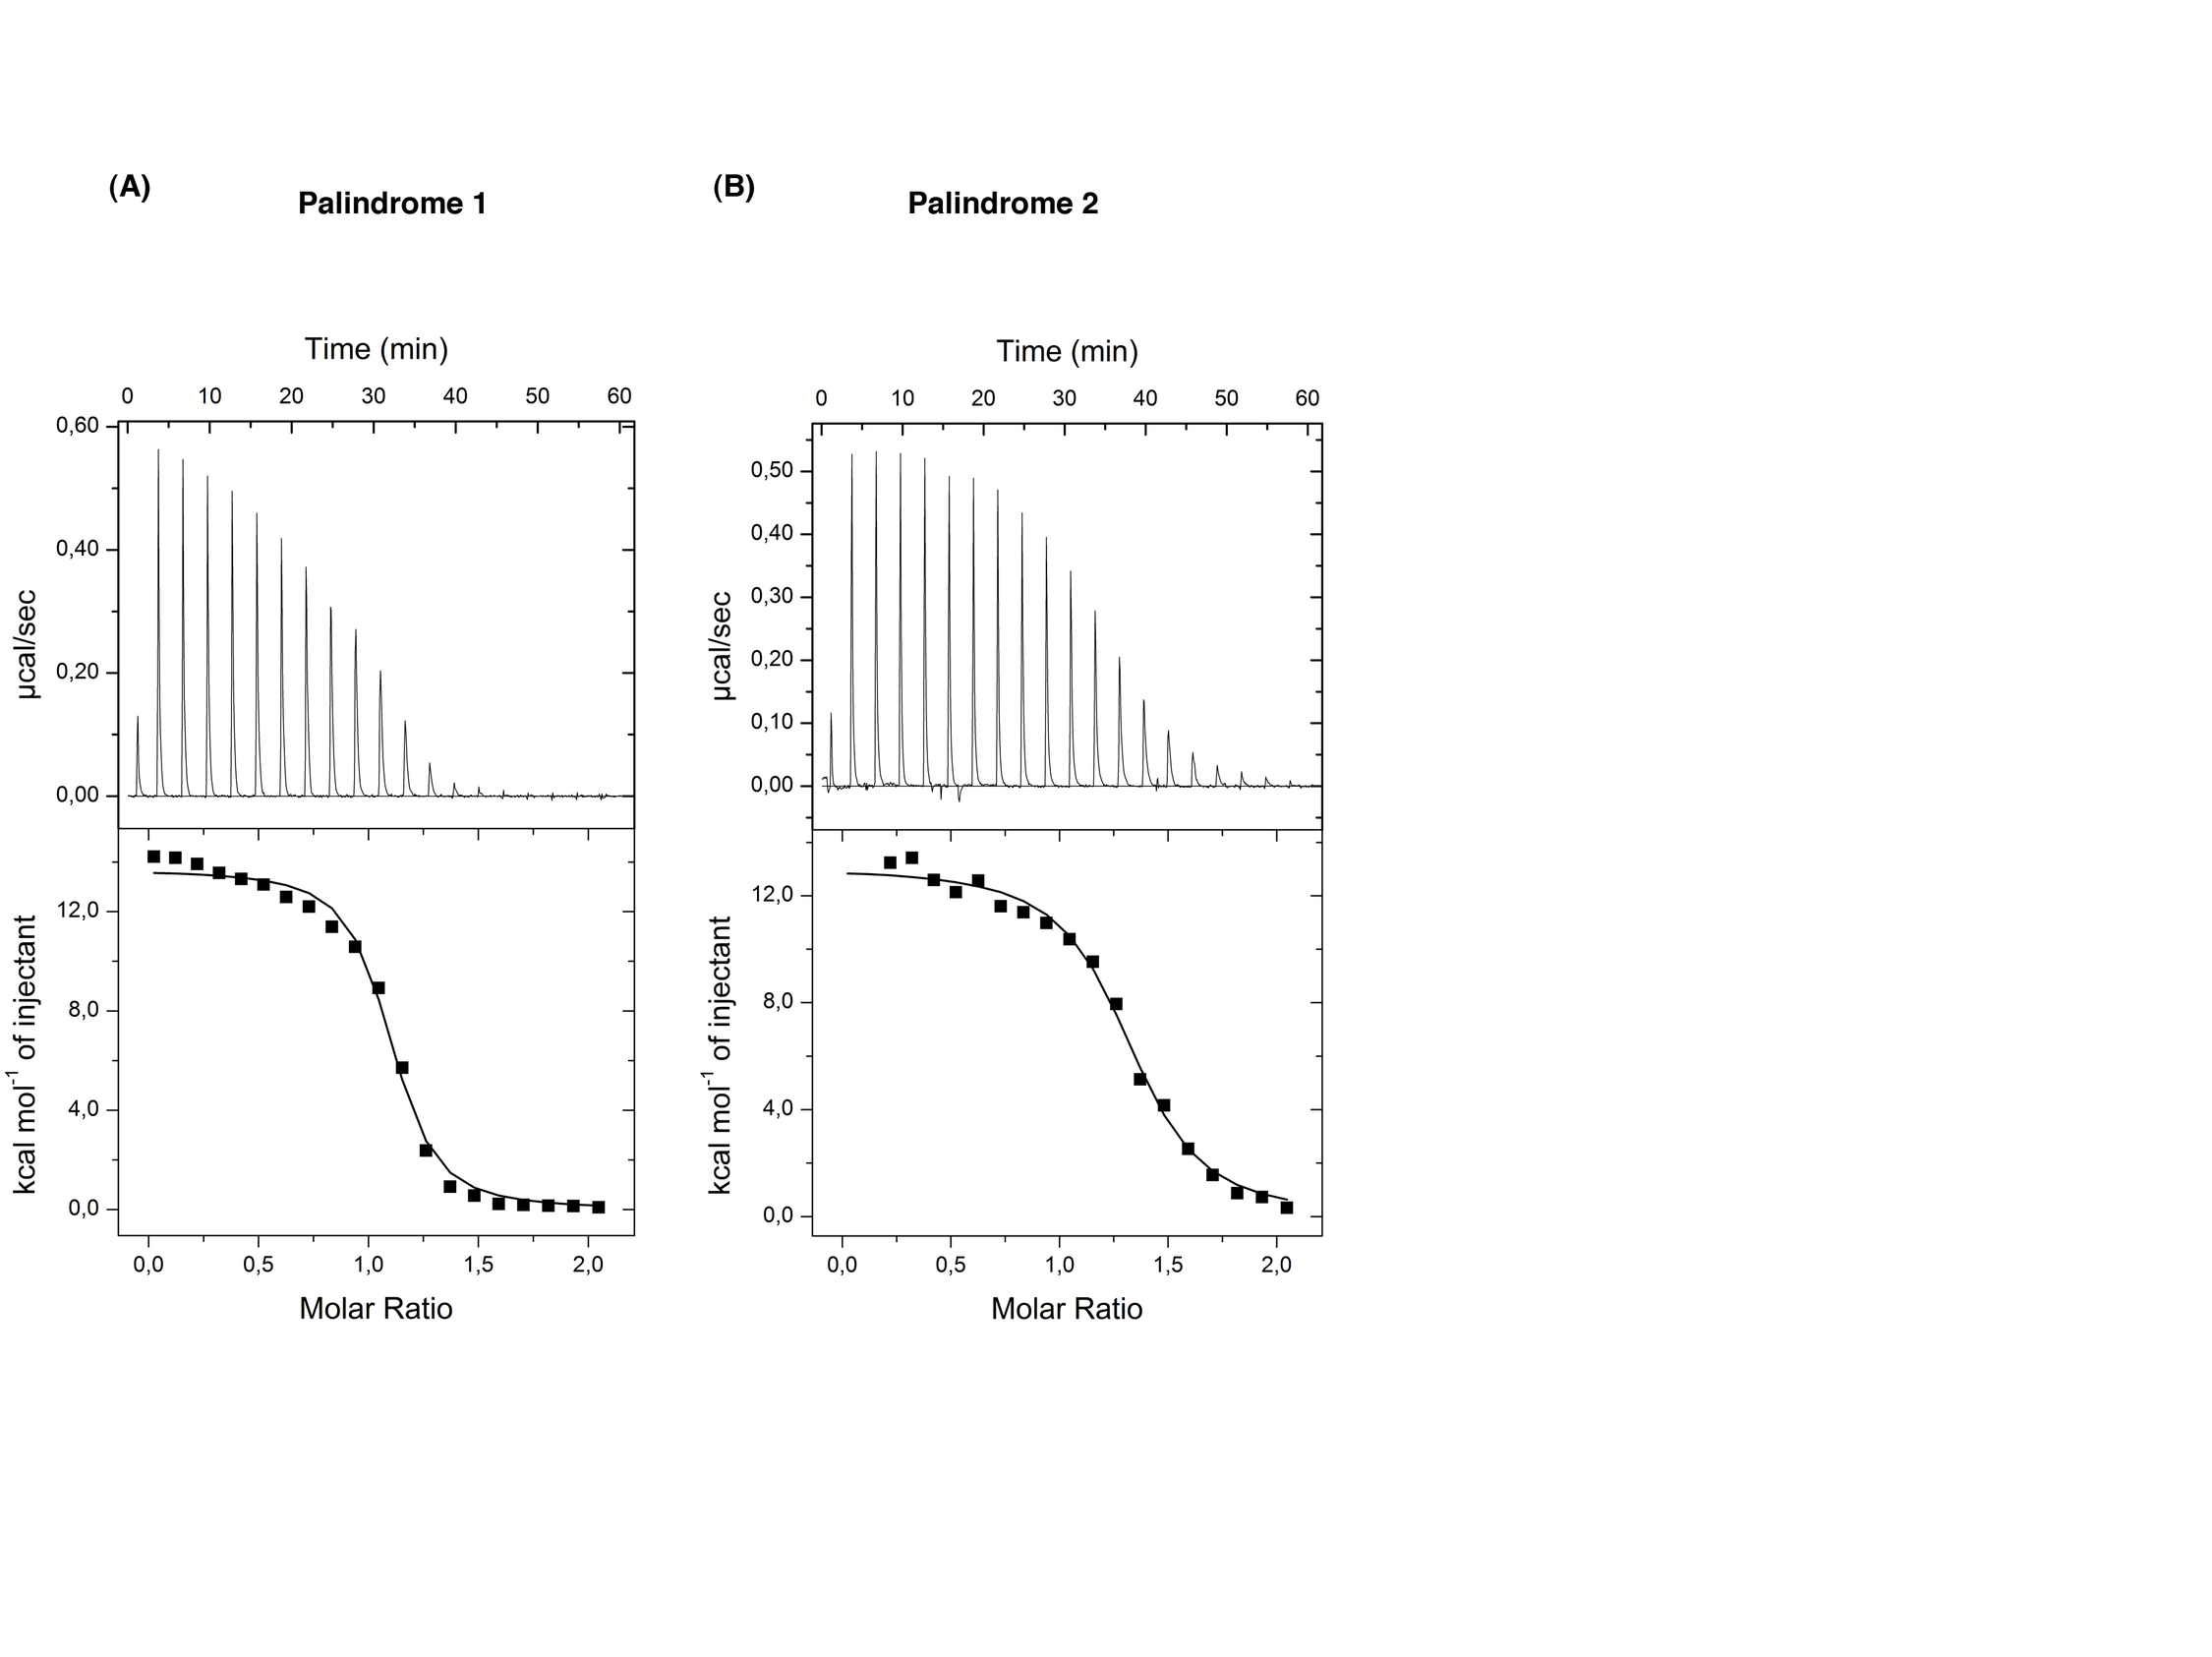

Supplement: Supplementary file 1 [file 1 › pone.0210123.s004.tif]

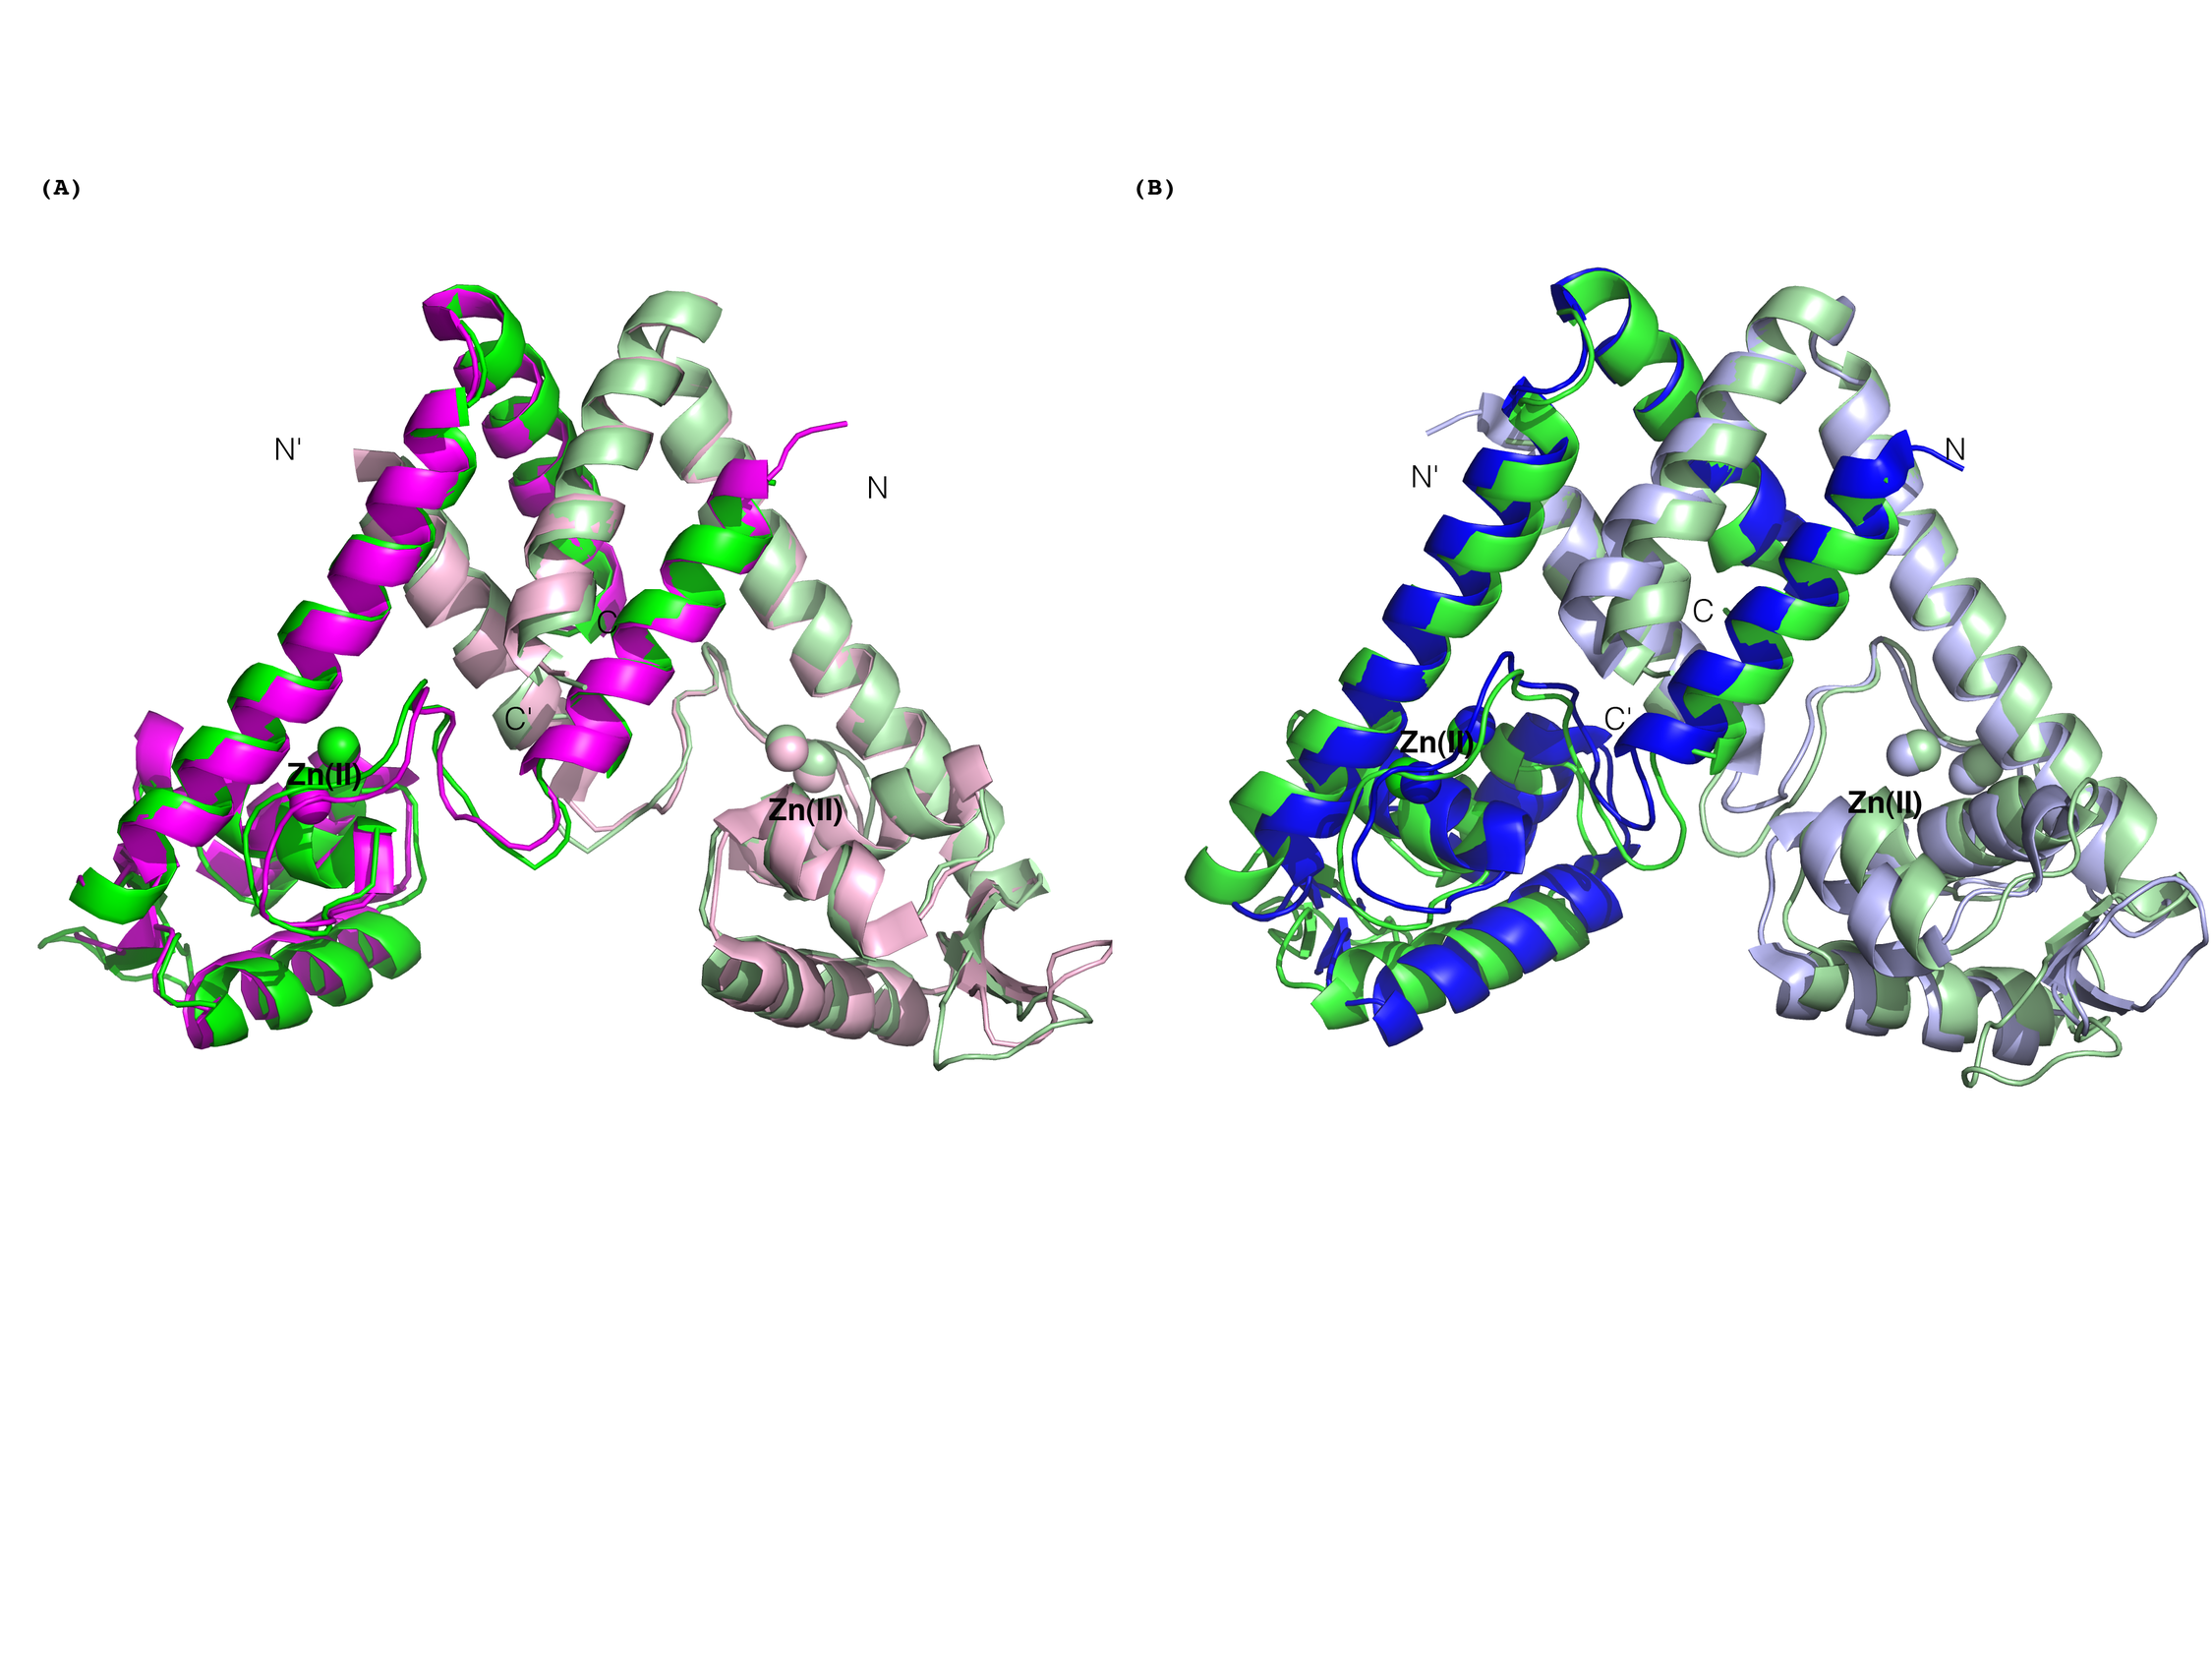

Supplement: Supplementary file 1 [file 1 › pone.0210123.s005.tif]

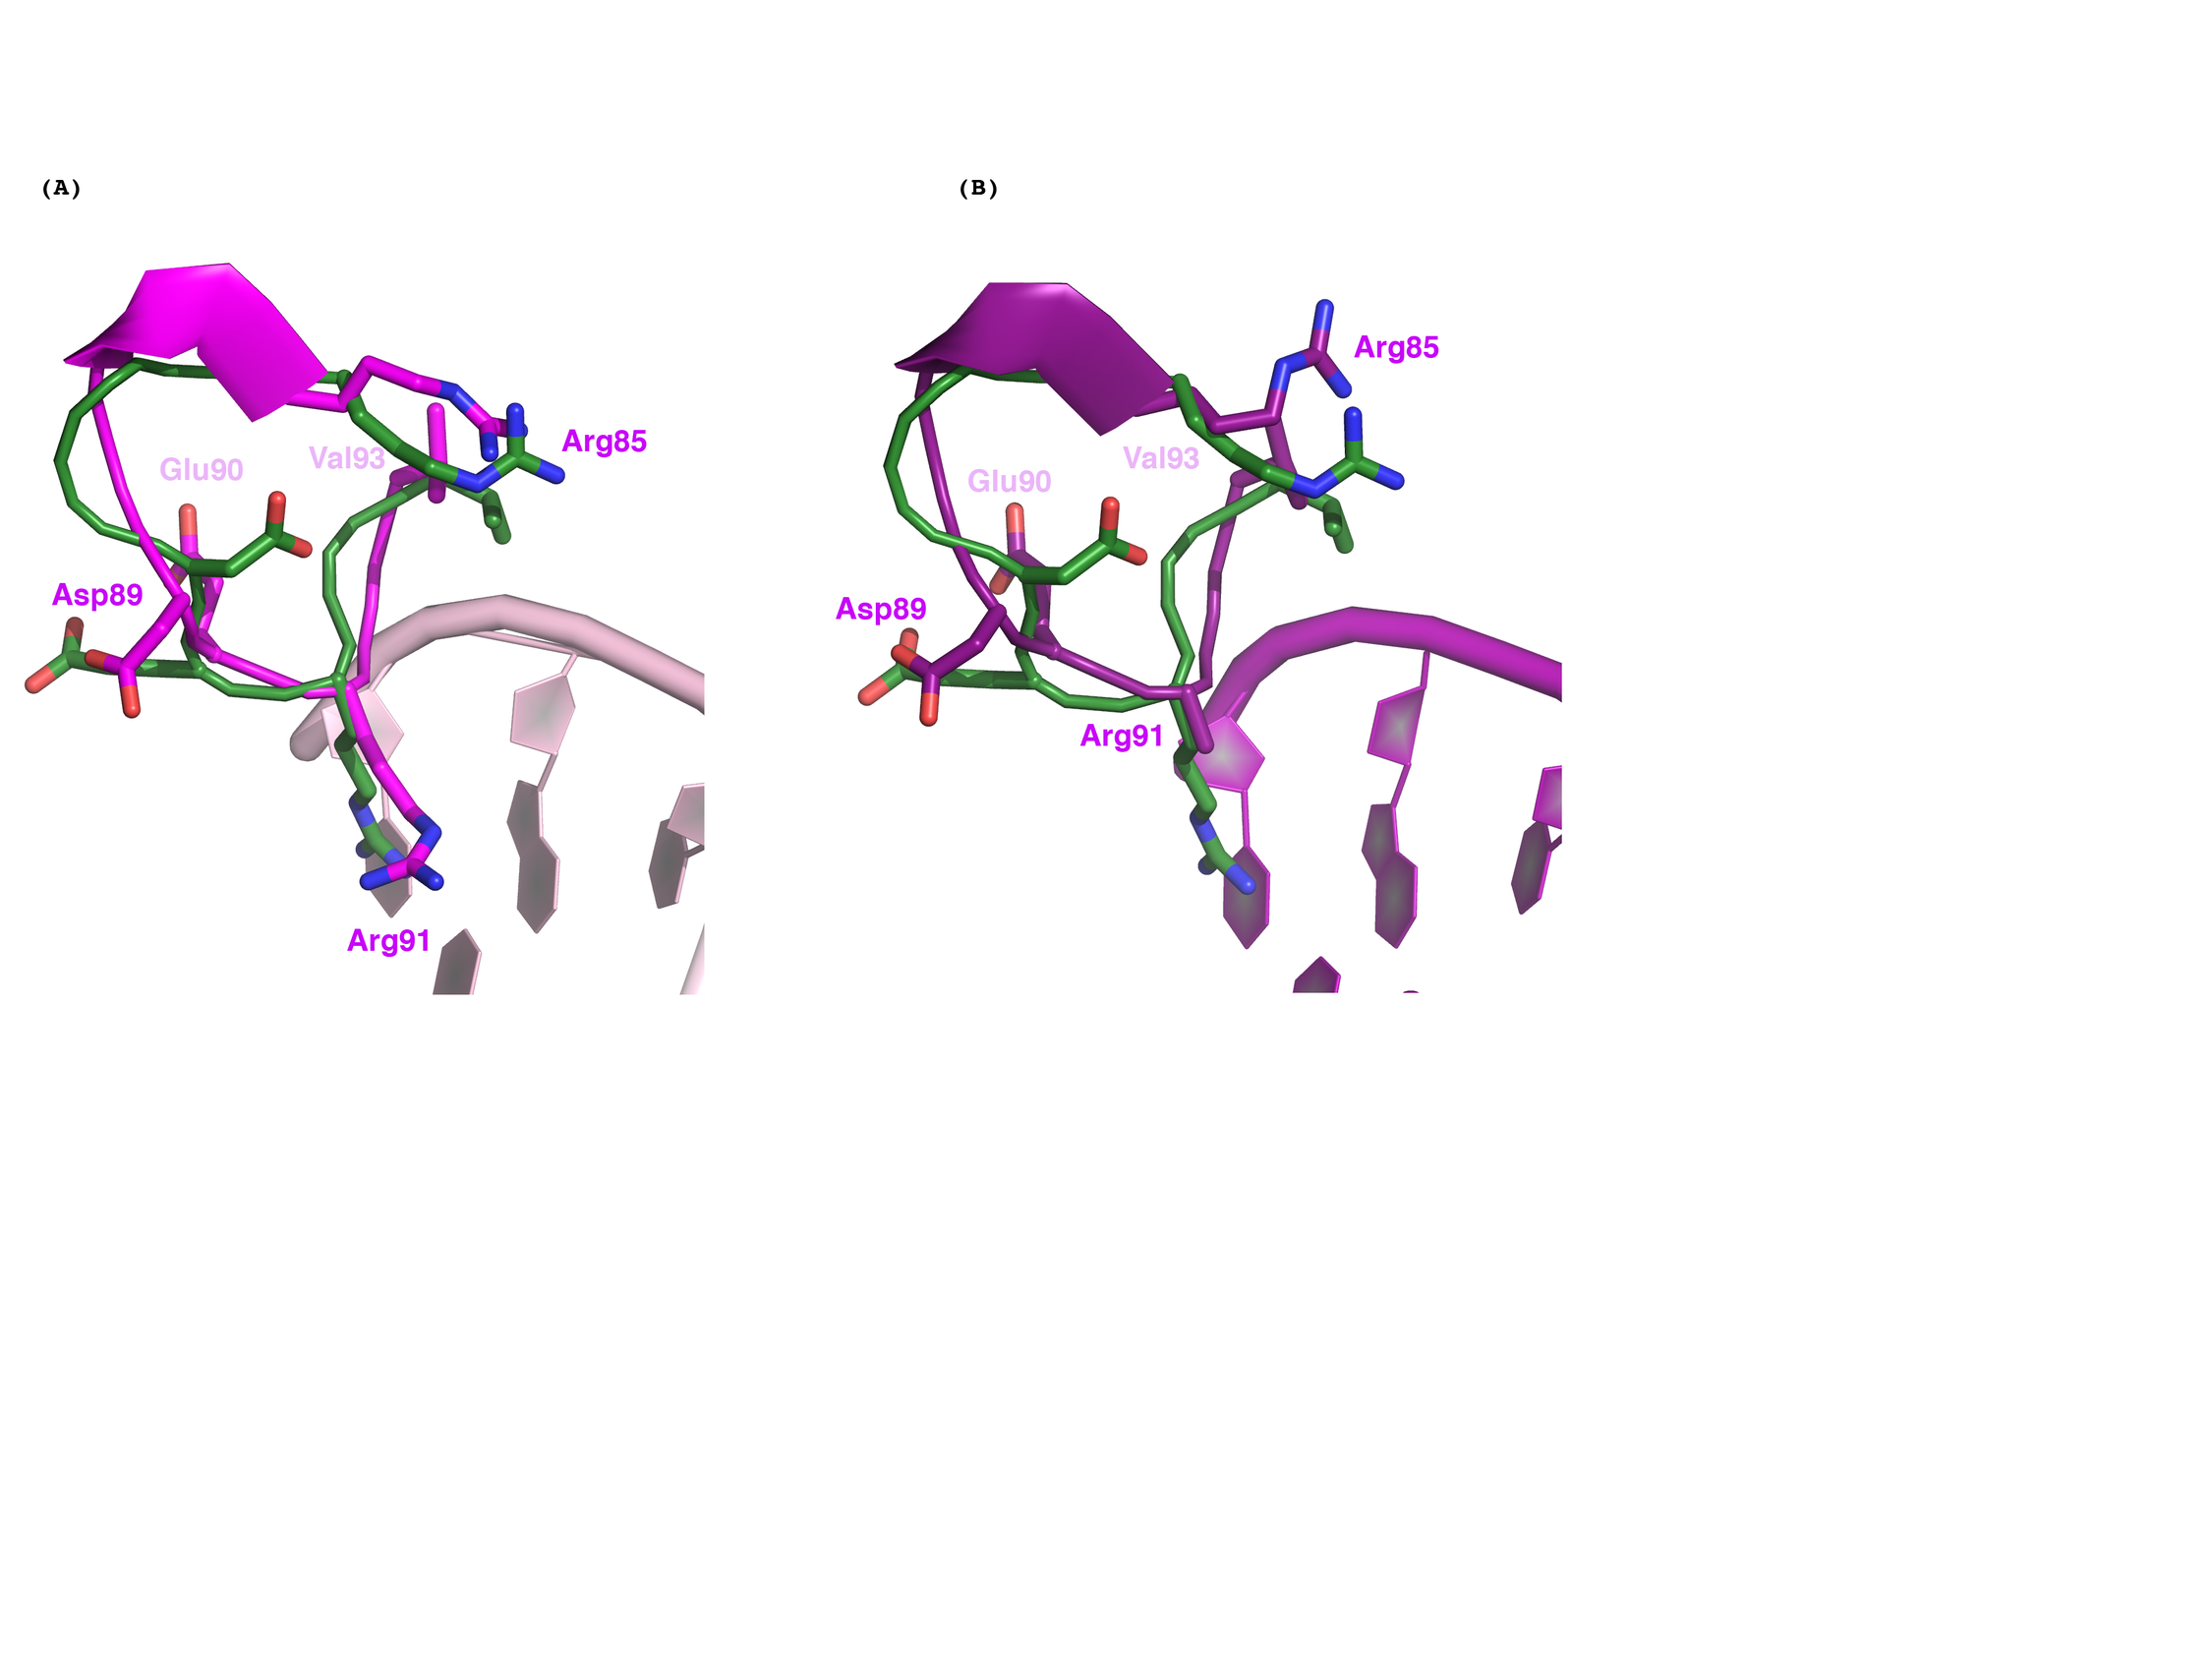

Supplement: Supplementary file 1 [file 1 › pone.0210123.s006.tif]

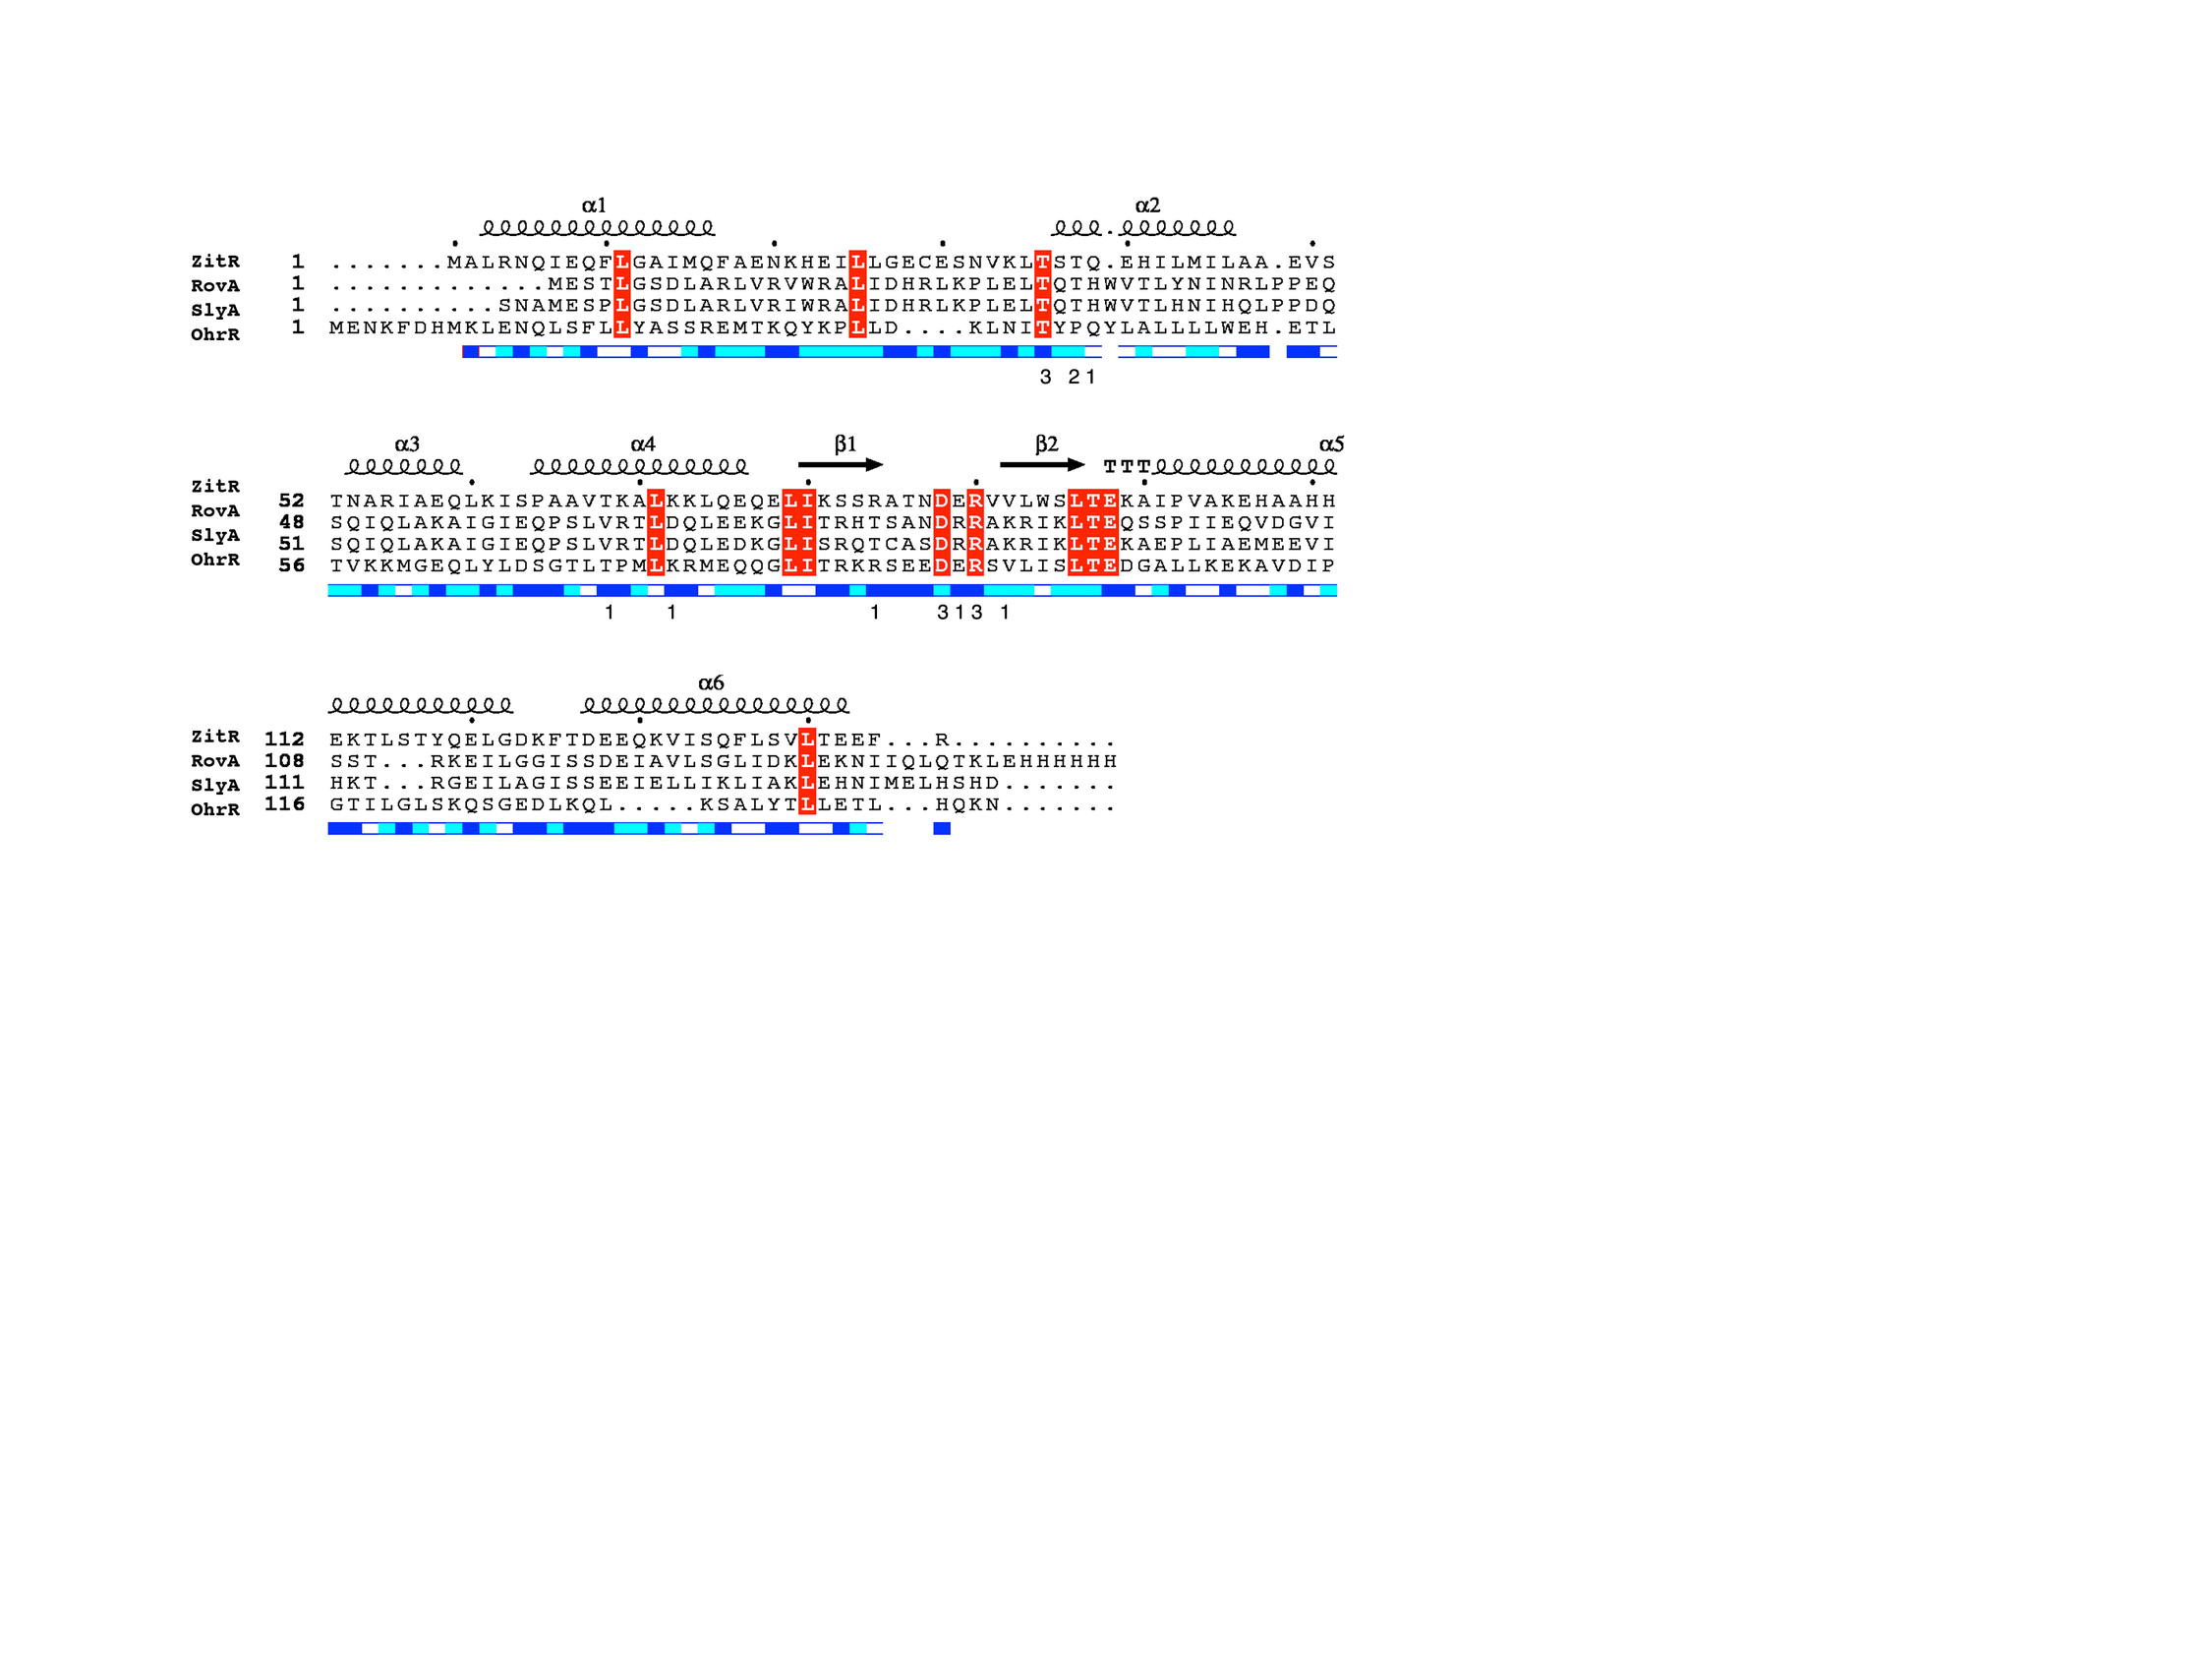

Supplement: Supplementary file 1 [file 1 › pone.0210123.s007.tif]

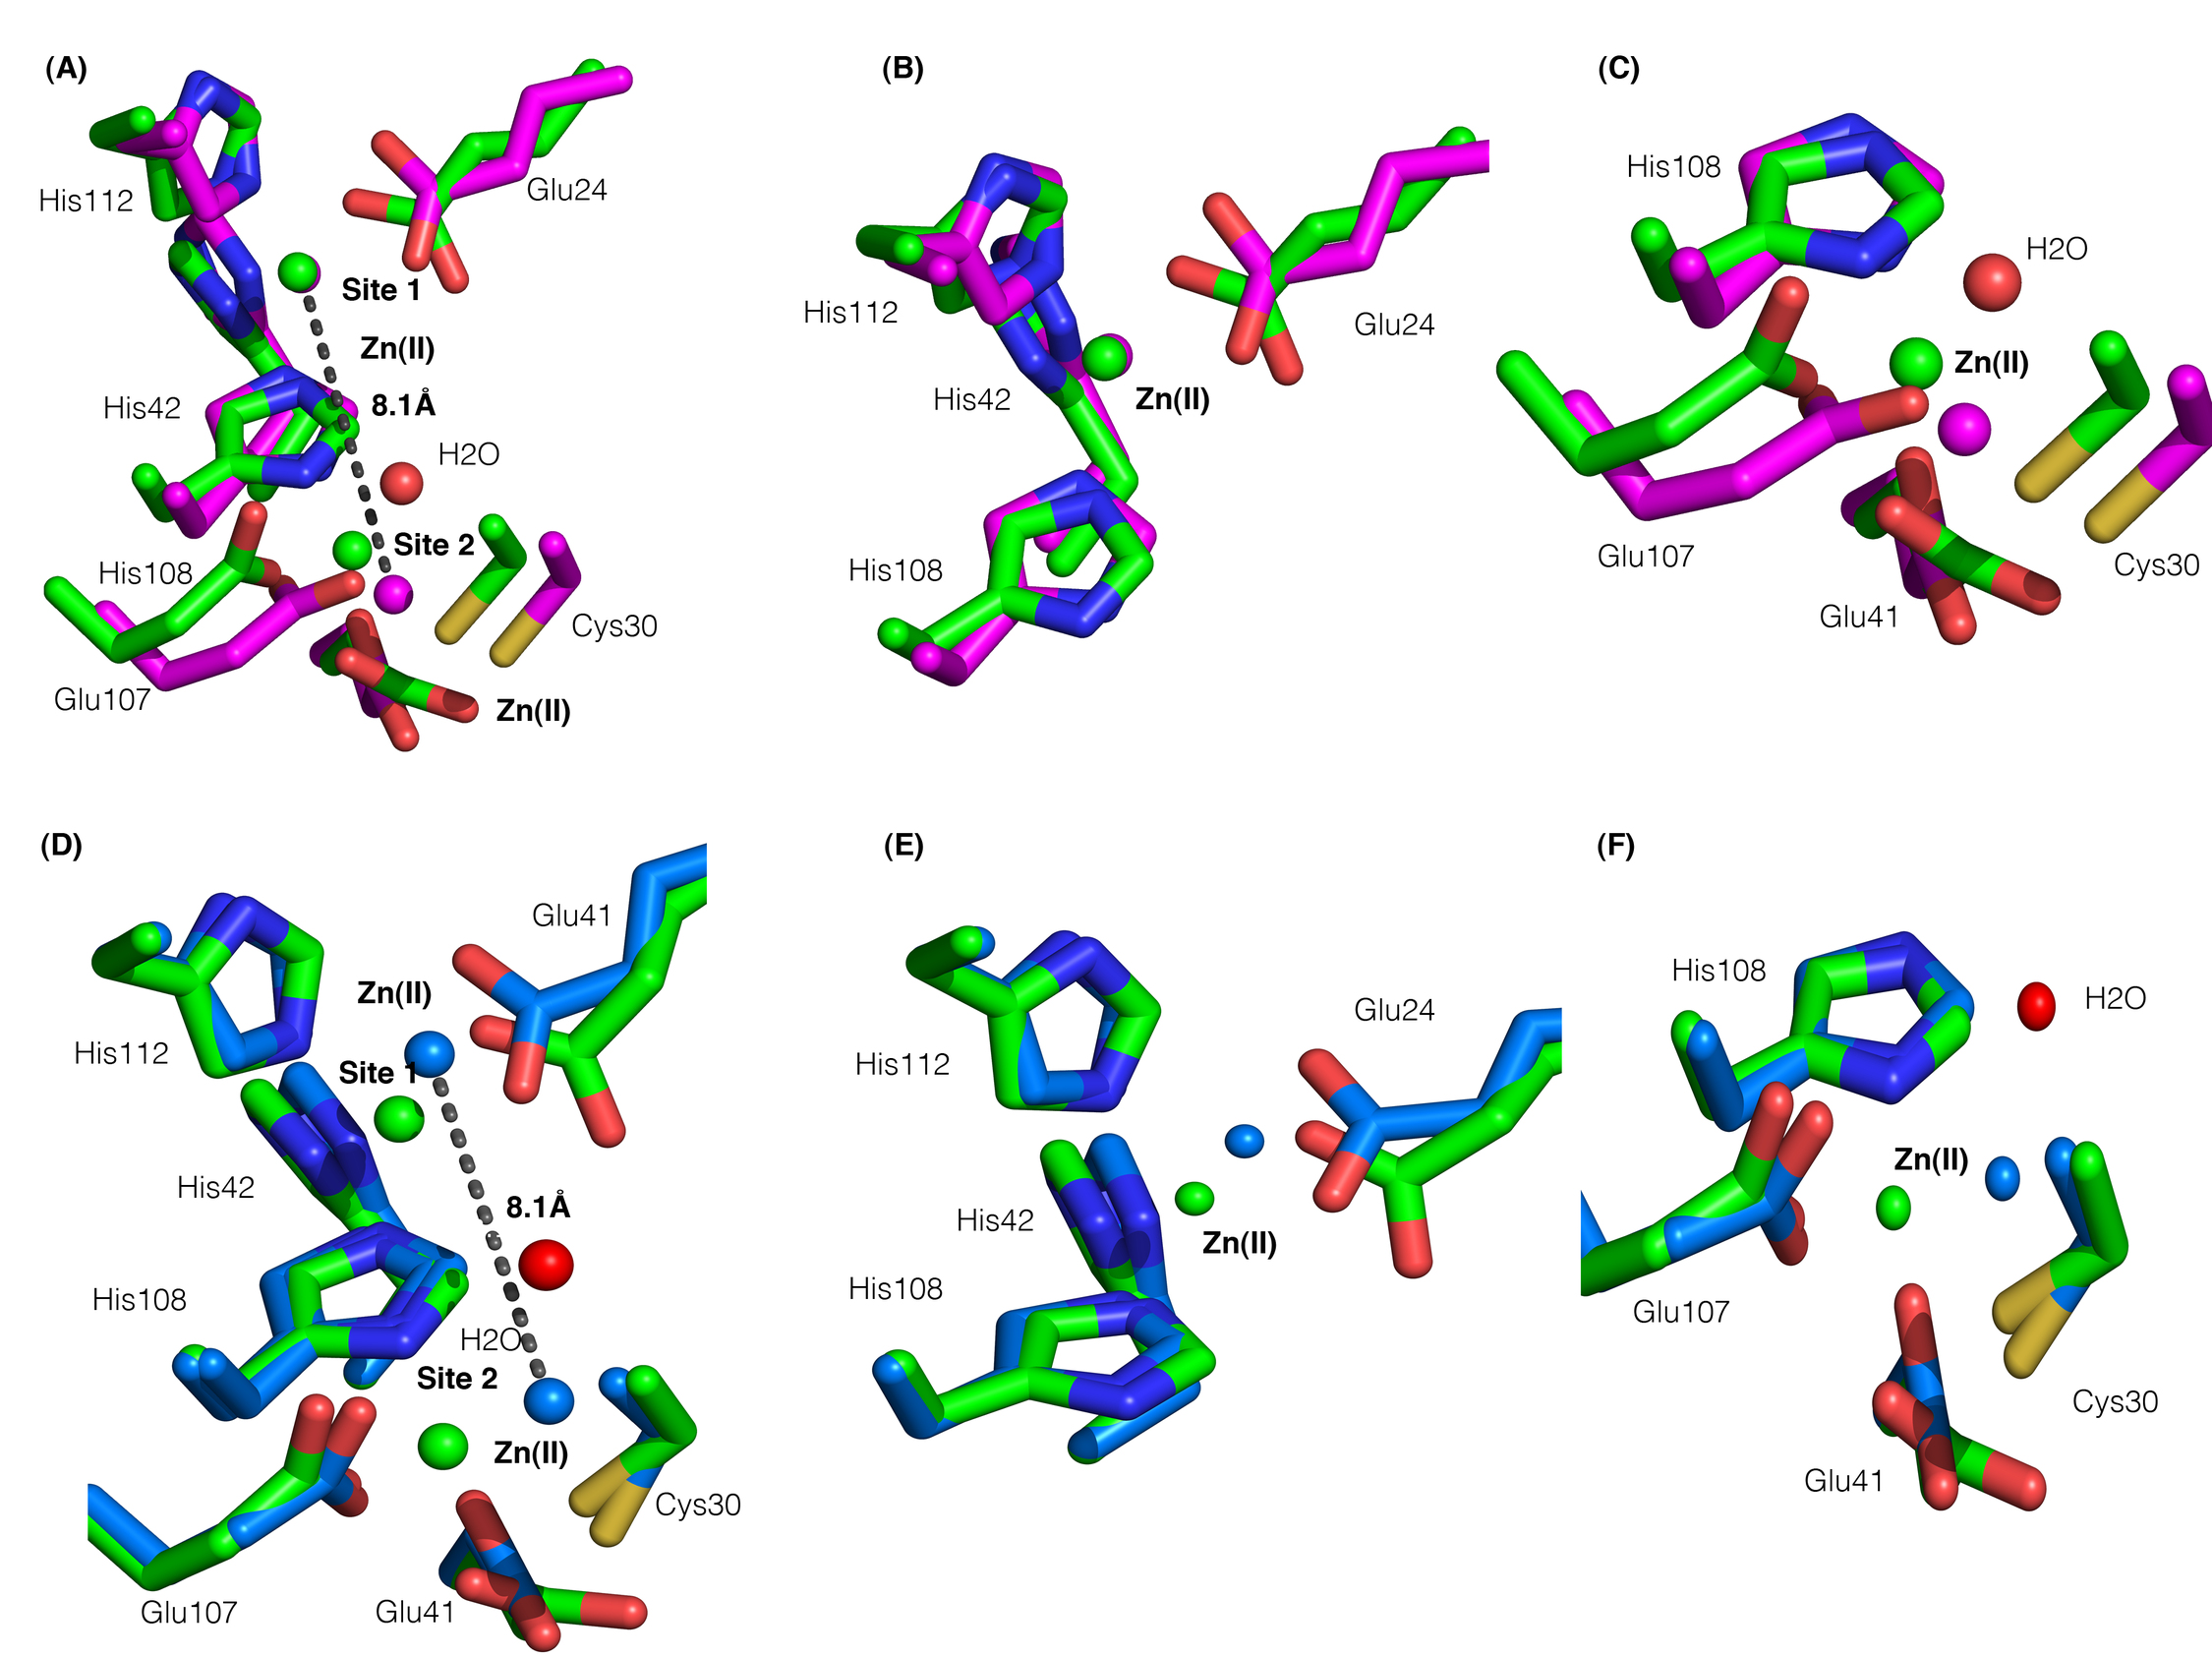

Supplement: Supplementary file 1 [file 1 › pone.0210123.s008.tif]
